# Supplementary material for: Dimensions of biodiversity loss: Spatial mismatch in land‐use impacts on species, functional and phylogenetic diversity of European bees
Source: PubMed Central journal article supplement (PMC5699437; doi:10.1111/ddi.12638), 2017-09-13
Supplement: DDI-23-1435-s001.pdf [file DDI-23-1435-s001.pdf]

Supplementary Material: Dimensions of biodiversity loss:  
spatial mismatch in land-use impacts on species, functional  
and phylogenetic diversity of European bees

De Palma et al

## Appendix S1 Dataset collation

Table S1.1: The following are data sources used in this analysis.  
See De Palma *et al.* (2016) for full details of dataset compilation.

<sup>†</sup>Data are taken from the PREDICTS database (openly available  
via <http://data.nhm.ac.uk>; Hudson *et al.*, 2017). <sup>‡</sup>Data are  
available from the referenced paper. For all other datasets, please  
contact the corresponding author of that paper directly.

| Source Number | Reference                                                                                                                                    |
|---------------|----------------------------------------------------------------------------------------------------------------------------------------------|
| 1             | Kruess & Tscharntke (2002)                                                                                                                   |
| 2             | Quaranta <i>et al.</i> (2004) <sup>†</sup>                                                                                                   |
| 3             | Marshall <i>et al.</i> (2006) <sup>†</sup>                                                                                                   |
| 4             | Meyer <i>et al.</i> (2007) <sup>†</sup>                                                                                                      |
| 5             | Billeter <i>et al.</i> (2007) <sup>†</sup> ,<br>Diekötter <i>et al.</i> (2008) <sup>†</sup> and Le<br>Féon <i>et al.</i> (2010) <sup>†</sup> |
| 6             | Franzén & Nilsson (2008) <sup>†</sup>                                                                                                        |

|    |                                                                         |
|----|-------------------------------------------------------------------------|
| 7  | Kohler <i>et al.</i> (2007) <sup>†</sup>                                |
| 8  | Albrecht <i>et al.</i> (2010)                                           |
| 9  | Bates <i>et al.</i> (2011) <sup>†</sup>                                 |
| 10 | Power & Stout (2011) <sup>†</sup>                                       |
| 11 | Samnegård <i>et al.</i> (2011) <sup>†</sup>                             |
| 12 | Schüepp <i>et al.</i> (2011) <sup>†</sup>                               |
| 13 | Weiner <i>et al.</i> (2011)                                             |
| 14 | Hanley (2011) <sup>†</sup>                                              |
| 15 | Mudri-Stojnic <i>et al.</i> (2012) <sup>†‡</sup>                        |
| 16 | Jauker <i>et al.</i> (2013); Meyer<br><i>et al.</i> (2009) <sup>†</sup> |
| 17 | Fowler (2014) <sup>†</sup>                                              |

---

---

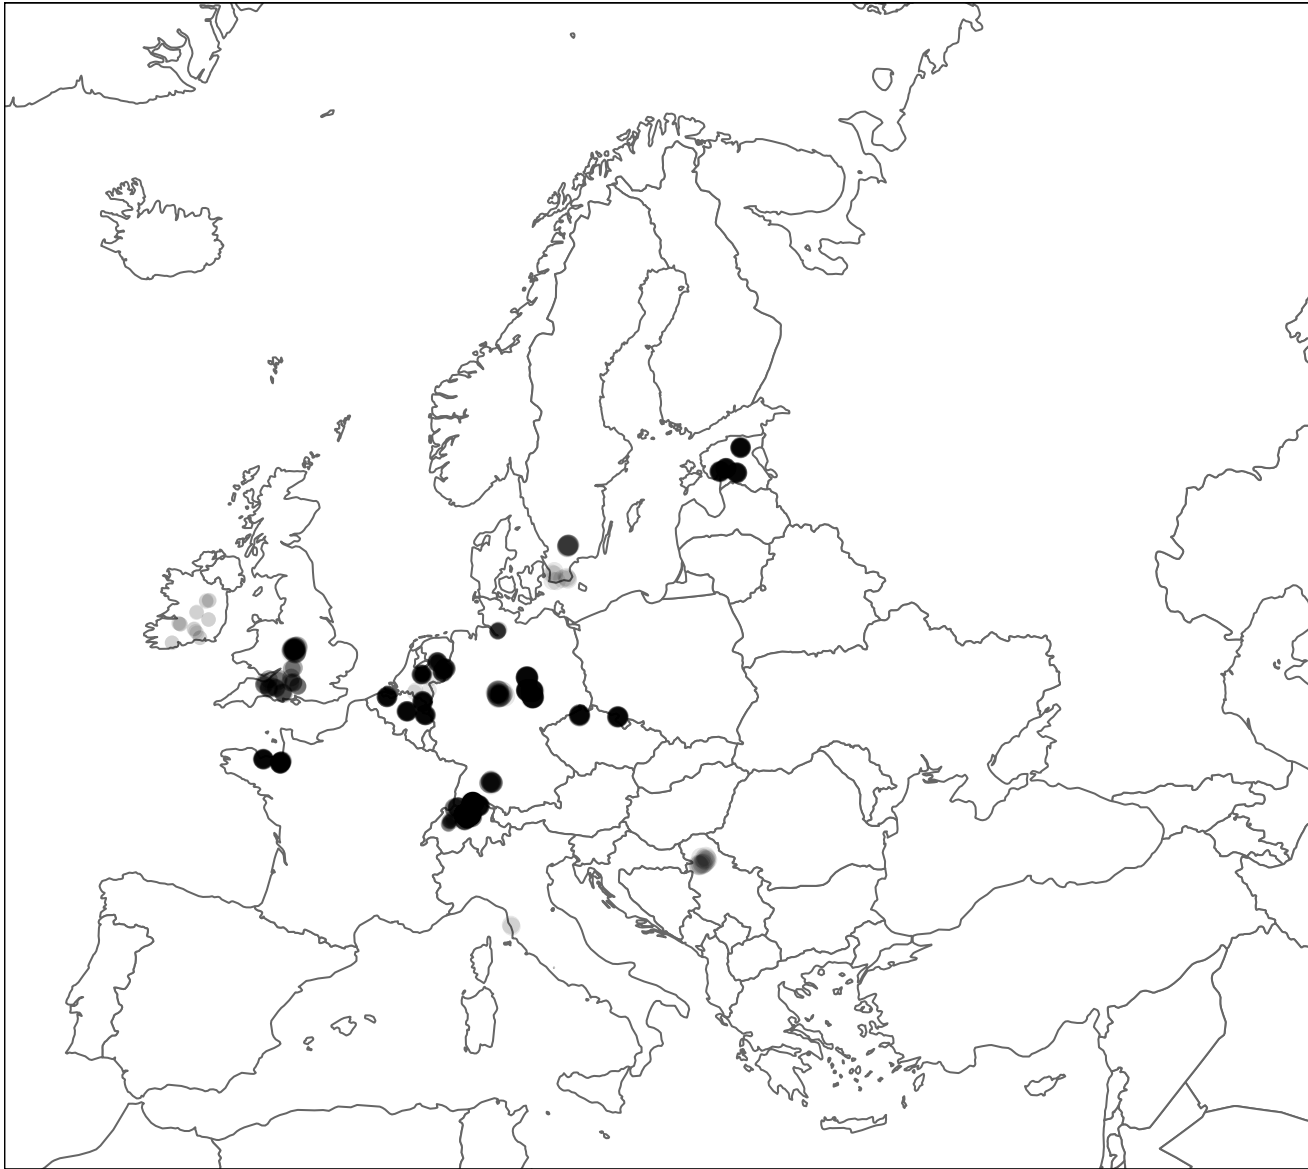

Figure S1.1: Map of sites in Europe from which bee abundance data were available. The size of the points correspond to the number of bee species sampled at the site (log-transformed). Note that all points are semi-transparent; points that appear opaque are therefore indicative of areas where multiple sites have been sampled.

Table S1.2: Land-use class and intensity definitions as used in Hudson *et al.* (2014)

| Level 1 Land Use                                   | Predominant Land Use                     | Minimal use                                                                                                                                                                               | Light use                                                                                                                                                                                                                                                         | Intense use                                                                                                                                                                                                                                                             |
|----------------------------------------------------|------------------------------------------|-------------------------------------------------------------------------------------------------------------------------------------------------------------------------------------------|-------------------------------------------------------------------------------------------------------------------------------------------------------------------------------------------------------------------------------------------------------------------|-------------------------------------------------------------------------------------------------------------------------------------------------------------------------------------------------------------------------------------------------------------------------|
| No evidence of prior destruction of the vegetation | Primary forest                           | Any disturbances identified are very minor (e.g., a trail or path) or very limited in the scope of their effect (e.g., hunting of a particular species of limited ecological importance). | One or more disturbances of moderate intensity (e.g., selective logging) or breadth of impact (e.g., bushmeat extraction), which are not severe enough to markedly change the nature of the ecosystem. Primary sites in suburban settings are at least Light use. | One or more disturbances that is severe enough to markedly change the nature of the ecosystem; this includes clear-felling of part of the site too recently for much recovery to have occurred. Primary sites in fully urban settings should be classed as Intense use. |
|                                                    | Primary Non-Forest                       | As above                                                                                                                                                                                  | As above                                                                                                                                                                                                                                                          | As above                                                                                                                                                                                                                                                                |
| Recovering after destruction of the vegetation     | Mature Secondary Vegetation              | As for Primary Vegetation-Minimal use                                                                                                                                                     | As for Primary Vegetation-Light use                                                                                                                                                                                                                               | As for Primary Vegetation-Intense use                                                                                                                                                                                                                                   |
|                                                    | Intermediate Secondary Vegetation        | As for Primary Vegetation-Minimal use                                                                                                                                                     | As for Primary Vegetation-Light use                                                                                                                                                                                                                               | As for Primary Vegetation-Intense use                                                                                                                                                                                                                                   |
|                                                    | Young Secondary Vegetation               | As for Primary Vegetation-Minimal use                                                                                                                                                     | As for Primary Vegetation-Light use                                                                                                                                                                                                                               | As for Primary Vegetation-Intense use                                                                                                                                                                                                                                   |
|                                                    | Secondary Vegetation                     | As for Primary Vegetation-Minimal use                                                                                                                                                     | As for Primary Vegetation-Light use                                                                                                                                                                                                                               | As for Primary Vegetation-Intense use                                                                                                                                                                                                                                   |
|                                                    | Secondary Vegetation (indeterminate age) | As for Primary Vegetation-Minimal use                                                                                                                                                     | As for Primary Vegetation-Light use                                                                                                                                                                                                                               | As for Primary Vegetation-Intense use                                                                                                                                                                                                                                   |
|                                                    | Secondary Vegetation (indeterminate age) | As for Primary Vegetation-Minimal use                                                                                                                                                     | As for Primary Vegetation-Light use                                                                                                                                                                                                                               | As for Primary Vegetation-Intense use                                                                                                                                                                                                                                   |

| <b>Human use (agricultural)</b> | <b>Plantation forest</b>                                                                                                                                                                                                                                                      | <b>Monoculture fruit/coffee/rubber</b>                                                                                                                                                                                                  | <b>Monoculture fruit/coffee/rubber</b>                                                                                                                                                                                      |
|---------------------------------|-------------------------------------------------------------------------------------------------------------------------------------------------------------------------------------------------------------------------------------------------------------------------------|-----------------------------------------------------------------------------------------------------------------------------------------------------------------------------------------------------------------------------------------|-----------------------------------------------------------------------------------------------------------------------------------------------------------------------------------------------------------------------------|
|                                 | Extensively managed or mixed timber, fruit/coffee, oil-palm or rubber plantations in which native understorey and/or other native tree species are tolerated, which are not treated with pesticide or fertiliser, and which have not been recently (< 20 years) clear-felled. | Monoculture timber plantations of mixed age with no recent (< 20 years) clear-felling. Monoculture oil-palm plantations with no recent (< 20 years) clear-felling.                                                                      | Monoculture fruit/coffee/rubber plantations with significant pesticide input. Monoculture timber plantations with similarly aged trees or timber/oil-palm plantations with extensive recent (< 20 years) clear-felling.     |
|                                 | <b>Cropland</b>                                                                                                                                                                                                                                                               |                                                                                                                                                                                                                                         |                                                                                                                                                                                                                             |
|                                 | Low-intensity farms, typically with small fields, mixed crops, crop rotation, little or no inorganic fertiliser use, little or no pesticide use, little or no ploughing, little or no irrigation, little or no mechanisation.                                                 | Medium intensity farming, typically showing some but not many of the following: large fields, annual ploughing, inorganic fertiliser application, pesticide application, irrigation, no crop rotation, mechanisation, monoculture crop. | High-intensity monoculture farming, typically showing many of the following features: large fields, annual ploughing, inorganic fertiliser application, pesticide application, irrigation, mechanisation, no crop rotation. |
|                                 | <b>Pasture</b>                                                                                                                                                                                                                                                                |                                                                                                                                                                                                                                         |                                                                                                                                                                                                                             |
|                                 | Pasture with minimal input of fertiliser and pesticide, and with low stock density ( <i>not</i> high enough to cause significant disturbance or to stop regeneration of vegetation).                                                                                          | Pasture either with significant input of fertiliser or pesticide, or with high stock density (high enough to cause significant disturbance or to stop regeneration of vegetation).                                                      | Pasture with significant input of fertiliser or pesticide, <i>and</i> with high stock density (high enough to cause significant disturbance or to stop regeneration of vegetation).                                         |
| <b>Human use (urban)</b>        | <b>Urban</b>                                                                                                                                                                                                                                                                  | Suburban (e.g. gardens), or small managed or unmanaged green spaces in cities.                                                                                                                                                          | Fully urban with no significant green spaces.                                                                                                                                                                               |

Table S1.3: Original and coarsened factor levels of species traits

| Trait         | Coarsened factor levels | Original levels                                                                                     | Rationale                                                                                                                                                                                                                                                                                                                                                                                                                                                                                                                                                                                |
|---------------|-------------------------|-----------------------------------------------------------------------------------------------------|------------------------------------------------------------------------------------------------------------------------------------------------------------------------------------------------------------------------------------------------------------------------------------------------------------------------------------------------------------------------------------------------------------------------------------------------------------------------------------------------------------------------------------------------------------------------------------------|
| Nesting trait | Excavators              | Excavators in the soil or vegetation                                                                | This trait was coarsened to represent two distinct nesting strategies: those that build their own holes versus those that don't. Excavators are particular about nesting sites, often requiring hard, bare ground or pithy stems, whilst those that don't excavate use existing cavities or old nesting sites, regardless of nest location.                                                                                                                                                                                                                                              |
|               | Non-excavators          | Carder bees, renters, masons, cleptoparasites and social parasites                                  |                                                                                                                                                                                                                                                                                                                                                                                                                                                                                                                                                                                          |
| Sociality     | Obligately solitary     | Solitary, solitary or communal, communal, cleptoparasitic                                           | The sociality of the species was defined according to how their offspring are raised, because this relates to reproductive capacity. Social species, or those that raise their young in social nests (such as social parasites), are able to produce greater numbers of offspring because there are more workers to provision those offspring. Primitively eusocial species are able to adjust their reproductive capacity, often according to resource requirements: for example, <i>Halictus rubicundus</i> is social in warmer, more resource rich areas but solitary in other areas. |
|               | Not obligately solitary | Highly eusocial, primitively eusocial, solitary/primitively eusocial, polymorphic, social parasites |                                                                                                                                                                                                                                                                                                                                                                                                                                                                                                                                                                                          |
| Lecty         | No Lecty status         | No Lecty status                                                                                     | Species with no lecty status are those which do not collect their own pollen, for example cleptoparasites. Phenotypic flexibility can be considered as a form of generalism so species that can be either oligolectic or polylectic are considered in the same category as the pollen generalists.                                                                                                                                                                                                                                                                                       |
|               | Obligately oligolectic  | Oligolectic                                                                                         |                                                                                                                                                                                                                                                                                                                                                                                                                                                                                                                                                                                          |
|               | Polylectic/Flexible     | Polylectic, oligolectic or polylectic                                                               |                                                                                                                                                                                                                                                                                                                                                                                                                                                                                                                                                                                          |
| Voltinism     | Univoltine              | Univoltine                                                                                          | Species were split into two categories: those with only one generation per year, and those that do have or can have more than one generation per year, as the latter are predicted to be less impacted by local threats                                                                                                                                                                                                                                                                                                                                                                  |
|               | Multivoltine/Flexible   | Bivoltine, multivoltine, univoltine or bivoltine, univoltine or multivoltine                        |                                                                                                                                                                                                                                                                                                                                                                                                                                                                                                                                                                                          |

## Appendix S1.1 Species list, based on taxonomy from Michener (2000)

|                                |                              |
|--------------------------------|------------------------------|
| <i>Amegilla quadrifasciata</i> | <i>Andrena florivaga</i>     |
| <i>Andrena agilissima</i>      | <i>Andrena fucata</i>        |
| <i>Andrena alfkenella</i>      | <i>Andrena fulva</i>         |
| <i>Andrena angustior</i>       | <i>Andrena fulvago</i>       |
| <i>Andrena anthrisci</i>       | <i>Andrena fulvata</i>       |
| <i>Andrena barbilabris</i>     | <i>Andrena fulvida</i>       |
| <i>Andrena bicolor</i>         | <i>Andrena fuscipes</i>      |
| <i>Andrena bucephala</i>       | <i>Andrena gravida</i>       |
| <i>Andrena carantonica</i>     | <i>Andrena haemorrhoea</i>   |
| <i>Andrena chrysopus</i>       | <i>Andrena hattorfiana</i>   |
| <i>Andrena chrysoseles</i>     | <i>Andrena helvola</i>       |
| <i>Andrena cineraria</i>       | <i>Andrena humilis</i>       |
| <i>Andrena cinerea</i>         | <i>Andrena intermedia</i>    |
| <i>Andrena clarkella</i>       | <i>Andrena labialis</i>      |
| <i>Andrena coitana</i>         | <i>Andrena labiata</i>       |
| <i>Andrena combinata</i>       | <i>Andrena lagopus</i>       |
| <i>Andrena congruens</i>       | <i>Andrena lapponica</i>     |
| <i>Andrena curvungula</i>      | <i>Andrena lathyri</i>       |
| <i>Andrena decipiens</i>       | <i>Andrena minutula</i>      |
| <i>Andrena denticulata</i>     | <i>Andrena minutuloides</i>  |
| <i>Andrena distinguenda</i>    | <i>Andrena miserabilis</i>   |
| <i>Andrena dorsata</i>         | <i>Andrena mitis</i>         |
| <i>Andrena enslinella</i>      | <i>Andrena nasuta</i>        |
| <i>Andrena falsifica</i>       | <i>Andrena nigroaenea</i>    |
| <i>Andrena flavipes</i>        | <i>Andrena nigroolivacea</i> |
| <i>Andrena florea</i>          | <i>Andrena nitida</i>        |
| <i>Andrena floricola</i>       | <i>Andrena nitidiuscula</i>  |
|                                | <i>Andrena niveata</i>       |

|                               |                              |
|-------------------------------|------------------------------|
| <i>Andrena ovatula</i>        | <i>Anthophora aestivalis</i> |
| <i>Andrena pandellei</i>      | <i>Anthophora atroalba</i>   |
| <i>Andrena pilipes</i>        | <i>Anthophora dispar</i>     |
| <i>Andrena praecox</i>        | <i>Anthophora furcata</i>    |
| <i>Andrena propinqua</i>      | <i>Anthophora plumipes</i>   |
| <i>Andrena proxima</i>        | <i>Anthophora retusa</i>     |
| <i>Andrena rosae</i>          | <i>Apis mellifera</i>        |
| <i>Andrena rufa</i>           | <i>Bombus barbutellus</i>    |
| <i>Andrena ruficrus</i>       | <i>Bombus bohemicus</i>      |
| <i>Andrena sabulosa</i>       | <i>Bombus campestris</i>     |
| <i>Andrena saundersella</i>   | <i>Bombus cryptarum</i>      |
| <i>Andrena semilaevis</i>     | <i>Bombus distinguendus</i>  |
| <i>Andrena similis</i>        | <i>Bombus gerstaeckeri</i>   |
| <i>Andrena strombella</i>     | <i>Bombus hortorum</i>       |
| <i>Andrena subopaca</i>       | <i>Bombus humilis</i>        |
| <i>Andrena synadelpha</i>     | <i>Bombus hypnorum</i>       |
| <i>Andrena tarsata</i>        | <i>Bombus jonellus</i>       |
| <i>Andrena tibialis</i>       | <i>Bombus lapidarius</i>     |
| <i>Andrena ungeri</i>         | <i>Bombus lucorum</i>        |
| <i>Andrena vaga</i>           | <i>Bombus magnus</i>         |
| <i>Andrena varians</i>        | <i>Bombus monticola</i>      |
| <i>Andrena ventralis</i>      | <i>Bombus muscorum</i>       |
| <i>Andrena viridescens</i>    | <i>Bombus norvegicus</i>     |
| <i>Andrena vulpecula</i>      | <i>Bombus pascuorum</i>      |
| <i>Andrena wilkella</i>       | <i>Bombus pomorum</i>        |
| <i>Anthidiellum strigatum</i> | <i>Bombus pratensis</i>      |
| <i>Anthidium manicatum</i>    | <i>Bombus pratorum</i>       |
| <i>Anthidium punctatum</i>    | <i>Bombus ruderarius</i>     |
|                               | <i>Bombus ruderatus</i>      |
|                               | <i>Bombus rupestris</i>      |



|                                |                               |
|--------------------------------|-------------------------------|
| <i>Bombus schrencki</i>        | <i>Eucera longicornis</i>     |
| <i>Bombus semenoviellus</i>    | <i>Eucera nigrescens</i>      |
| <i>Bombus soroensis</i>        | <i>Halictus confusus</i>      |
| <i>Bombus subterraneus</i>     | <i>Halictus gemmeus</i>       |
| <i>Bombus sylvarum</i>         | <i>Halictus kessleri</i>      |
| <i>Bombus sylvestris</i>       | <i>Halictus langobardicus</i> |
| <i>Bombus terrestris</i>       | <i>Halictus maculatus</i>     |
| <i>Bombus vestalis</i>         | <i>Halictus patellatus</i>    |
| <i>Bombus veteranus</i>        | <i>Halictus pollinosus</i>    |
| <i>Bombus wurflenii</i>        | <i>Halictus quadricinctus</i> |
| <i>Camptopoeum frontale</i>    | <i>Halictus rubicundus</i>    |
| <i>Ceratina cucurbitina</i>    | <i>Halictus scabiosae</i>     |
| <i>Ceratina cyanea</i>         | <i>Halictus semitectus</i>    |
| <i>Ceratina nigrolabiata</i>   | <i>Halictus simplex</i>       |
| <i>Chelostoma campanularum</i> | <i>Halictus subauratus</i>    |
| <i>Chelostoma distinctum</i>   | <i>Halictus tumulorum</i>     |
| <i>Chelostoma florissomne</i>  | <i>Heriades crenulatus</i>    |
| <i>Chelostoma rapunculi</i>    | <i>Heriades truncorum</i>     |
| <i>Coelioxys inermis</i>       | <i>Hoplitis anthocopoides</i> |
| <i>Coelioxys rufescens</i>     | <i>Hoplitis claviventris</i>  |
| <i>Colletes cunicularius</i>   | <i>Hoplitis leucomelana</i>   |
| <i>Colletes daviesanus</i>     | <i>Hylaeus angustatus</i>     |
| <i>Colletes floralis</i>       | <i>Hylaeus annularis</i>      |
| <i>Colletes succinctus</i>     | <i>Hylaeus brevicornis</i>    |
| <i>Dasypoda plumipes</i>       | <i>Hylaeus communis</i>       |
| <i>Dufourea dentiventris</i>   | <i>Hylaeus confusus</i>       |
| <i>Eucera clypeata</i>         | <i>Hylaeus difformis</i>      |
| <i>Eucera eucnemidea</i>       | <i>Hylaeus gibbus</i>         |
|                                | <i>Hylaeus gredleri</i>       |
|                                | <i>Hylaeus hyalinatus</i>     |

|                                   |                                    |
|-----------------------------------|------------------------------------|
| <i>Hylaeus nigrinus</i>           | <i>Lasioglossum lucidulum</i>      |
| <i>Hylaeus paulus</i>             | <i>Lasioglossum majus</i>          |
| <i>Hylaeus punctatus</i>          | <i>Lasioglossum malachurum</i>     |
| <i>Hylaeus rinki</i>              | <i>Lasioglossum minutissimum</i>   |
| <i>Hylaeus signatus</i>           | <i>Lasioglossum minutulum</i>      |
| <i>Hylaeus sinuatus</i>           | <i>Lasioglossum morio</i>          |
| <i>Hylaeus styriacus</i>          | <i>Lasioglossum nigripes</i>       |
| <i>Hylaeus variegatus</i>         | <i>Lasioglossum nitidiusculum</i>  |
| <i>Lasioglossum aeratum</i>       | <i>Lasioglossum nitidulum</i>      |
| <i>Lasioglossum albipes</i>       | <i>Lasioglossum pallens</i>        |
| <i>Lasioglossum albocinctum</i>   | <i>Lasioglossum parvulum</i>       |
| <i>Lasioglossum brevicorne</i>    | <i>Lasioglossum pauperatum</i>     |
| <i>Lasioglossum calceatum</i>     | <i>Lasioglossum pauxillum</i>      |
| <i>Lasioglossum clypeare</i>      | <i>Lasioglossum politum</i>        |
| <i>Lasioglossum corvinum</i>      | <i>Lasioglossum punctatissimum</i> |
| <i>Lasioglossum costulatum</i>    | <i>Lasioglossum puncticolle</i>    |
| <i>Lasioglossum cupromicans</i>   | <i>Lasioglossum pygmaeum</i>       |
| <i>Lasioglossum discum</i>        | <i>Lasioglossum quadrinotatum</i>  |
| <i>Lasioglossum fratellum</i>     | <i>Lasioglossum rufitarse</i>      |
| <i>Lasioglossum fulvicorne</i>    | <i>Lasioglossum sabulosum</i>      |
| <i>Lasioglossum glabriusculum</i> | <i>Lasioglossum semilucens</i>     |
| <i>Lasioglossum interruptum</i>   | <i>Lasioglossum sexnotatum</i>     |
| <i>Lasioglossum laevigatum</i>    | <i>Lasioglossum sexstrigatum</i>   |
| <i>Lasioglossum laticeps</i>      | <i>Lasioglossum smeathmanellum</i> |
| <i>Lasioglossum lativentre</i>    | <i>Lasioglossum subfasciatum</i>   |
| <i>Lasioglossum leucopus</i>      | <i>Lasioglossum tricinctum</i>     |
| <i>Lasioglossum leucozonium</i>   | <i>Lasioglossum villosulum</i>     |
| <i>Lasioglossum lineare</i>       | <i>Lasioglossum xanthopus</i>      |
|                                   | <i>Lasioglossum zonulum</i>        |
|                                   | <i>Lithurgus cornutus</i>          |

*Macropis europaea*  
*Macropis fulvipes*  
*Megachile albisecta*  
*Megachile alpicola*  
*Megachile apicalis*  
*Megachile centuncularis*  
*Megachile circumcincta*  
*Megachile ericetorum*  
*Megachile ligniseca*  
*Megachile nigriventris*  
*Megachile pilidens*  
*Megachile versicolor*  
*Megachile willughbiella*  
*Melecta albifrons*  
*Melitta haemorrhoidalis*  
*Melitta leporina*  
*Melitta nigricans*  
*Melitta tricineta*  
*Melitturga clavicornis*  
*Nomada alboguttata*  
*Nomada armata*  
*Nomada bifasciata*  
*Nomada castellana*  
*Nomada fabriciana*  
*Nomada ferruginata*  
*Nomada flava*  
*Nomada flavoguttata*  
*Nomada flavopicta*  
*Nomada fucata*  
*Nomada fulvicornis*  
*Nomada goodeniana*  
*Nomada guttulata*  
*Nomada hirtipes*  
*Nomada lathburiana*  
*Nomada leucophthalma*  
*Nomada marshamella*  
*Nomada miniuscula*  
*Nomada obtusifrons*  
*Nomada panzeri*  
*Nomada ruficornis*  
*Nomada rufipes*  
*Nomada sexfasciata*  
*Nomada sheppardana*  
*Nomada signata*  
*Nomada stoeckherti*  
*Nomada striata*  
*Nomada succincta*  
*Nomada zonata*  
*Osmia adunca*  
*Osmia aurulenta*  
*Osmia bicolor*  
*Osmia bicornis*  
*Osmia brevicornis*  
*Osmia caerulescens*  
*Osmia cornigera*  
*Osmia leaiana*  
*Osmia parietina*  
*Osmia spinulosa*

*Osmia uncinata*  
*Panurgus banksianus*  
*Panurgus calcaratus*  
*Pseudapis diversipes*  
*Rhodanthidium septemdentatum*  
*Rophites canus*  
*Rophites quinquespinosus*  
*Sphecodes albilabris*  
*Sphecodes alternatus*  
*Sphecodes crassus*  
*Sphecodes ephippius*  
*Sphecodes ferruginatus*  
*Sphecodes geoffrellus*  
*Sphecodes gibbus*  
*Sphecodes hyalinatus*  
*Sphecodes miniatus*  
*Sphecodes monilicornis*  
*Sphecodes niger*  
*Sphecodes pellucidus*  
*Sphecodes rufiventris*  
*Sphecodes scabricollis*  
*Sphecodes spinulosus*  
*Tetralonia macroglossa*  
*Tetraloniella alticincta*  
*Tetraloniella lyncea*  
*Tetraloniella nana*  
*Tetraloniella scabiosae*  
*Trachusa byssina*  
*Xylocopa violacea*

## Appendix S2 Supplementary Methods, Phylogeny

We used a birth-death polytomy resolver (?) to estimate the placement of missing species given their taxonomic affinities: congeners were constrained to be a sister in a monophyletic clade, unless the phylogenetic tree provided evidence against genus monophyly. Where species did not have congeners in the phylogenetic tree, we used higher-level taxonomic constraints for species placement; we only used such constraints where nodes had greater than 95% bootstrap support. *Caenaugochlora*, *Chlerogella*, *Pereirapis*, *Pseudaugochlora*, *Chalepogenus* and *Agapostemonoides* were restricted to their respective tribes, where monophyly was strongly supported (100% bootstrap support, Hedtke *et al.*, 2013). Note that *Agapostemonoides* was constrained within the tribe Caenohalictini, which is sometimes considered only a subtribe within the Halictini tribe (Danforth *et al.*, 2008). *Pachyprosopis* (Euryglossinae: Colletidae) was constrained to be sister to the tribes Euryglossinae, Scapterinae, and Xeromelissinae, but species were not permitted to enter the clades formed by the Xeromelissinae or Hylaeinae (Almeida & Danforth, 2009; Hedtke *et al.*, 2013). The genus *Ceylalictus* was constrained to be placed within its subfamily, Nomiodinae. Where synonyms were identified using the ITIS database (taxize package), these were merged (e.g., *Homalictus punctatus* was synonymised with *Lasioglossum punctatus*). Where the published phylogeny had species placements that appear very discrepant (i.e., the placement of *Ceratina japonica* and *Anthophora pillipes* outside of their otherwise monophyletic groups and placed with fairly distantly related species) and were noted as such by the authors of the tree (Hedtke *et al.*, 2013), these were considered missing species and their placement was estimated using *pastis*.

For twenty-eight bee clades with missing species (these were usually subfamilies or tribes which had greater than 85% bootstrap support; Table S2.1), a phylogenetic tree was developed using a birth-death model with zero extinction rate and exponential speciation rate using MrBayes, for at least 100,000,000 generations and four runs, with samples taken every 10000 generations. Tracer v1.4.1 was used to track effective sample sizes to assess convergence of parameter estimates. The standard deviation of split frequencies of the four independent runs were also assessed (with a value of less than 0.01 taken as evidence that the models were reaching convergence). From each of the converged runs, we then sub-sampled from the post-burn-in

posterior distribution of each bee clade to produce 1000 within-clade trees. A large clade of apid bees did not reach parameter convergence in any of the four independent runs, but measures of phylogenetic signal within the clade were not significantly different between runs (analysis of variance,  $F_{df=3} = 1.27$ , n.s.), so a random sample from all runs were taken. Random samples (without replacement) were then taken from the set of within-clade trees for each bee clade and were grafted onto the original phylogenetic tree. The original tree had first been rate smoothed, using PATHd8 (with the root age constrained to one) (Britton *et al.*, 2007), which is a computationally efficient methods for large phylogenetic trees, and incomplete clades were pruned. To graft the clades onto the original tree, the clade was first scaled to have a depth of 1; the edge lengths were then scaled by the age of the crown node of the clade.

Table S2.1: Details of bee clades (subsections of the tree, within each of which the placement of missing species was estimated using *pastis* (Thomas *et al.*, 2013) and MrBayes (Ronquist *et al.*, 2012)). Percentage bootstrap support for the node is shown for the genus tree from Hedtke *et al.* (2013) unless indicated otherwise. The number of generations run in MrBayes is also provided (some larger clades were run for longer in order to reach convergence).

| Family | Clade                      | Bootstrap support | Generations<br>(millions) |
|--------|----------------------------|-------------------|---------------------------|
| Apidae | Meloponini, Bombini, Apini | 74                | 200                       |
| Apidae | Euglossini                 | 100               | 100                       |
| Apidae | Centridini (Centris)       | 100               | 100                       |
| Apidae | Centridini (Epicharis)     | 100               | 100                       |
| Apidae | Allodapini and Ceratinini  | 100               | 100                       |
| Apidae | Manuelini                  | NA <sup>1</sup>   | 100                       |
| Apidae | Xylocopini                 | 85 <sup>2</sup>   | 100                       |

<sup>1</sup>No value available as only one species from this tribe is in the original tree

<sup>2</sup>Taken from species-level tree as only one genus is in this clade

|              |                                                                                                                                                                                                                                                                                                                     |     |     |
|--------------|---------------------------------------------------------------------------------------------------------------------------------------------------------------------------------------------------------------------------------------------------------------------------------------------------------------------|-----|-----|
| Apidae       | Epeolini, Brachynomadini,<br>ammobatoidini, Biastini,<br>Townsendiellini, Neolarrini, Nomadini,<br>Hexepeolini, Ammobatini, Melectini,<br>Caenoprospidini, Ericrocidini,<br>Rhathymini, Esepeolini, Osirini<br>(Epeoloides), Protepeolini, Osirini<br>(Osiris), Tetrapedini (Coelioxoides),<br>Osirini (Parepeolus) | 99  | 100 |
| Apidae       | Eucerini, Ancylini, Emphorini,<br>Tapinotaspidini, Exomalopsini,<br>Emphorini                                                                                                                                                                                                                                       | 100 | 100 |
| Apidae       | Anthophorini                                                                                                                                                                                                                                                                                                        | 100 | 100 |
| Andrenidae   | Andreninae                                                                                                                                                                                                                                                                                                          | 100 | 100 |
| Andrenidae   | Panurginae                                                                                                                                                                                                                                                                                                          | 99  | 100 |
| Halictidae   | Halictini                                                                                                                                                                                                                                                                                                           | 97  | 100 |
| Halictidae   | Sphecodini                                                                                                                                                                                                                                                                                                          | 100 | 100 |
| Halictidae   | Caenohalictini                                                                                                                                                                                                                                                                                                      | 99  | 100 |
| Halictidae   | Augochlorini                                                                                                                                                                                                                                                                                                        | 100 | 100 |
| Halictidae   | Nomiinae                                                                                                                                                                                                                                                                                                            | 100 | 100 |
| Halictidae   | Rophitinae                                                                                                                                                                                                                                                                                                          | 100 | 100 |
| Halictidae   | Nomiodinae                                                                                                                                                                                                                                                                                                          | 100 | 100 |
| Melittidae   | Melittidae                                                                                                                                                                                                                                                                                                          | 98  | 100 |
| Colettidae   | Hylaeinae, Scapterinae,<br>Euryglossinae, Xeromelissinae                                                                                                                                                                                                                                                            | 97  | 200 |
| Colettidae   | Colletini                                                                                                                                                                                                                                                                                                           | 100 | 100 |
| Colettidae   | Neophashaeinae                                                                                                                                                                                                                                                                                                      | 100 | 100 |
| Megachilidae | Megachilini                                                                                                                                                                                                                                                                                                         | 100 | 100 |
| Megachilidae | Lithurgini                                                                                                                                                                                                                                                                                                          | 100 | 100 |

|              |                                      |     |     |
|--------------|--------------------------------------|-----|-----|
| Megachilidae | Heriades                             | 100 | 100 |
| Megachilidae | Anthidini (anthidiellum & anthidini) | 100 | 100 |
| Megachilidae | Osmini                               | 100 | 100 |

---



## Appendix S3 Land-Use Intensity Maps

For maps of each land-use class (without land-use intensity), see Hoskins *et al.* (2016).

**Legend**

**Low-Intensity Cropland**

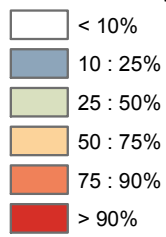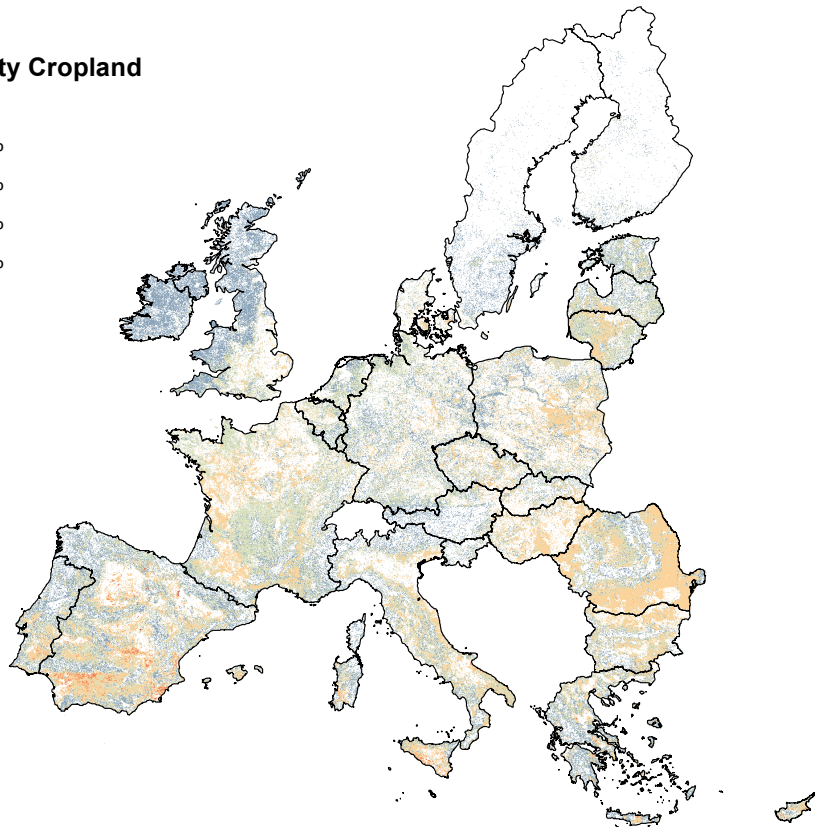

Figure S3.1: Percentage of each  $1\text{km}^2$  grid cell that is low-intensity cropland.

**Legend**

**Medium-Intensity Cropland**

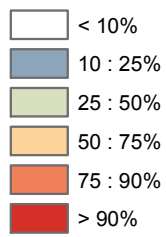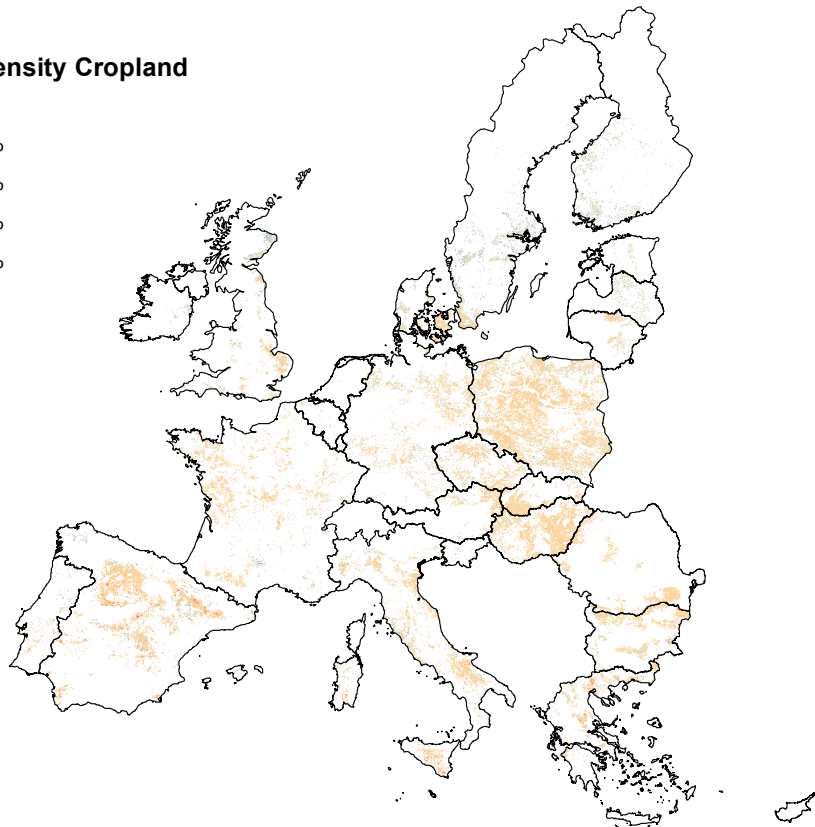

Figure S3.2: Percentage of each  $1km^2$  grid cell that is medium-intensity cropland.

**Legend**

**High-Intensity Cropland**

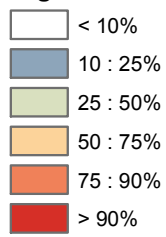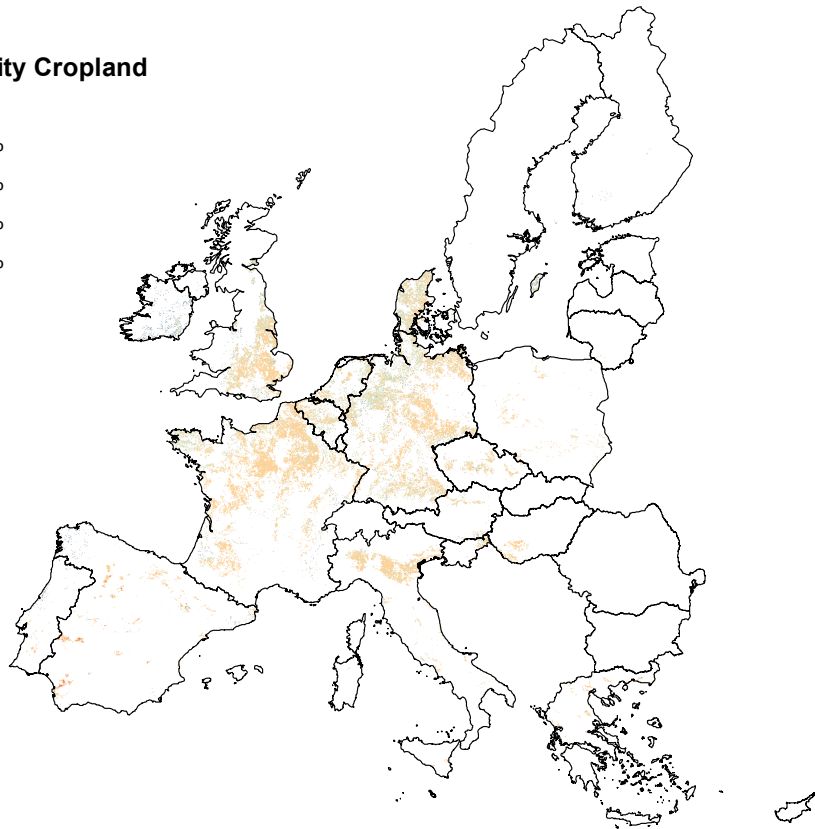

Figure S3.3: Percentage of each  $1km^2$  grid cell that is high-intensity cropland.

## Appendix S4 Supplementary Results

### Appendix S4.1 Spatial Autocorrelation Results

Moran's I was used to assess spatial autocorrelation in model residuals (spdep package: Bivand & Piras, 2015; Bivand *et al.*, 2013). There was no significant evidence of spatial autocorrelation in the model residuals for species (Moran's I = -1.06,  $p = 0.86$ ), functional (Moran's I = -0.94,  $p = 0.83$ ) or phylogenetic diversity (Moran's I = -0.98,  $p = 0.83$ ). Spatial autocorrelation was also assessed for the residuals of each study in turn. At most, two studies showed spatial autocorrelation in their residuals, but this was not more than expected by chance (one-sided  $\chi^2$  test:  $\chi^2 = 5.0294e - 32, p = 0.5$ ).

Table S4.1: Coefficient estimates (calculated using treatment contrasts in R statistics) and bootstrapped statistics (standard error, bias, confidence intervals) for the model of log-transformed taxonomic diversity. Significance is assumed if the bootstrapped 95% confidence intervals do not cross zero (indicated by significance stars). The first level of the land-use and intensity factor (Natural/semi-natural vegetation) forms part of the intercept term and so does not explicitly appear in the coefficients table.

| Coefficient               | Original estimate | Standard error | bootstrapped Standard error | Bias  | Lower 95% Confidence Interval | Upper 95% Confidence Interval |   |
|---------------------------|-------------------|----------------|-----------------------------|-------|-------------------------------|-------------------------------|---|
| Intercept                 | 1.43              | 0.15           | 0.16                        | -0.01 | 1.14                          | 1.72                          | * |
| Pasture                   | -0.39             | 0.15           | 0.16                        | 0.01  | -0.68                         | -0.10                         | * |
| Low-intensity cropland    | -0.12             | 0.18           | 0.18                        | 0.01  | -0.47                         | 0.25                          |   |
| Medium-intensity cropland | -0.51             | 0.17           | 0.17                        | 0.01  | -0.85                         | -0.17                         | * |
| High-intensity cropland   | -0.48             | 0.17           | 0.17                        | 0.01  | -0.82                         | -0.12                         | * |
| Urban                     | 0.07              | 0.13           | 0.14                        | 0.00  | -0.20                         | 0.33                          |   |

Table S4.2: Coefficient estimates (calculated using treatment contrasts in R statistics) and bootstrapped statistics (standard error, bias, confidence intervals) for the model of functional diversity. Significance is assumed if the bootstrapped 95% confidence intervals do not cross zero (indicated by significance stars). The first level of the land-use and intensity factor (Natural/semi-natural vegetation) forms part of the intercept term and so does not explicitly appear in the coefficients table. As log-transformed human population density (HPD) was scaled, the intercept is the mean logged HPD.

| Coefficient                    | Original estimate | Standard error | bootstrapped Standard error | Bias  | Lower 95% Confidence Interval | Upper 95% Confidence Interval |   |
|--------------------------------|-------------------|----------------|-----------------------------|-------|-------------------------------|-------------------------------|---|
| Intercept                      | 1.67              | 0.08           | 0.08                        | -0.00 | 1.52                          | 1.84                          | * |
| Pasture                        | -0.15             | 0.08           | 0.08                        | -0.00 | -0.32                         | -0.00                         | * |
| Low-intensity cropland         | 0.02              | 0.10           | 0.09                        | -0.00 | -0.17                         | 0.21                          |   |
| Medium-intensity cropland      | -0.18             | 0.09           | 0.09                        | 0.00  | -0.36                         | -0.02                         | * |
| High-intensity cropland        | -0.17             | 0.09           | 0.09                        | 0.00  | -0.35                         | -0.01                         | * |
| Urban                          | -0.02             | 0.12           | 0.12                        | -0.00 | -0.25                         | 0.21                          |   |
| Semi-natural vegetation: HPD   | -0.84             | 1.18           | 1.14                        | 0.01  | -3.02                         | 1.36                          |   |
| Pasture: HPD                   | 1.67              | 1.80           | 1.73                        | 0.07  | -1.75                         | 5.26                          |   |
| Low-intensity cropland: HPD    | 1.86              | 1.66           | 1.64                        | -0.02 | -1.32                         | 5.11                          |   |
| Medium-intensity cropland: HPD | -3.40             | 1.62           | 1.65                        | -0.05 | -6.71                         | -0.19                         | * |
| High-intensity cropland: HPD   | 1.68              | 1.51           | 1.44                        | -0.02 | -1.16                         | 4.75                          |   |
| Urban: HPD                     | 0.11              | 1.75           | 1.76                        | 0.01  | -3.40                         | 3.58                          |   |

Table S4.3: Coefficient estimates (calculated using treatment contrasts in R statistics) and bootstrapped statistics (standard error, bias, confidence intervals) for the model of phylogenetic diversity. Significance is assumed if the bootstrapped 95% confidence intervals do not cross zero (indicated by significance stars). The first level of the land-use and intensity factor (Natural/semi-natural vegetation) forms part of the intercept term and so does not explicitly appear in the coefficients table. As log-transformed human population density (HPD) was scaled, the intercept is the mean logged HPD.

| Coefficient                    | Original estimate | Standard error | bootstrapped Standard error | Bias  | Lower 95% Confidence Interval | Upper 95% Confidence Interval |   |
|--------------------------------|-------------------|----------------|-----------------------------|-------|-------------------------------|-------------------------------|---|
| Intercept                      | 1.50              | 0.06           | 0.06                        | 0.00  | 1.38                          | 1.61                          | * |
| Pasture                        | -0.15             | 0.06           | 0.06                        | 0.00  | -0.27                         | -0.02                         | * |
| Low-intensity cropland         | -0.03             | 0.07           | 0.07                        | 0.00  | -0.15                         | 0.10                          |   |
| Medium-intensity cropland      | -0.16             | 0.06           | 0.06                        | 0.00  | -0.29                         | -0.03                         | * |
| High-intensity cropland        | -0.15             | 0.06           | 0.06                        | 0.00  | -0.28                         | -0.03                         | * |
| Urban                          | -0.00             | 0.08           | 0.08                        | 0.00  | -0.16                         | 0.15                          |   |
| Semi-natural vegetation: HPD   | -1.00             | 0.79           | 0.77                        | -0.02 | -2.44                         | 0.46                          |   |
| Pasture: HPD                   | 1.37              | 1.20           | 1.24                        | 0.01  | -1.03                         | 3.75                          |   |
| Low-intensity cropland: HPD    | 1.60              | 1.10           | 1.07                        | 0.01  | -0.38                         | 3.73                          |   |
| Medium-intensity cropland: HPD | -1.44             | 1.07           | 1.08                        | -0.00 | -3.63                         | 0.66                          |   |
| High-intensity cropland: HPD   | 1.63              | 1.00           | 0.96                        | 0.03  | -0.23                         | 3.50                          |   |
| Urban: HPD                     | 0.47              | 1.17           | 1.11                        | 0.03  | -1.69                         | 2.70                          |   |



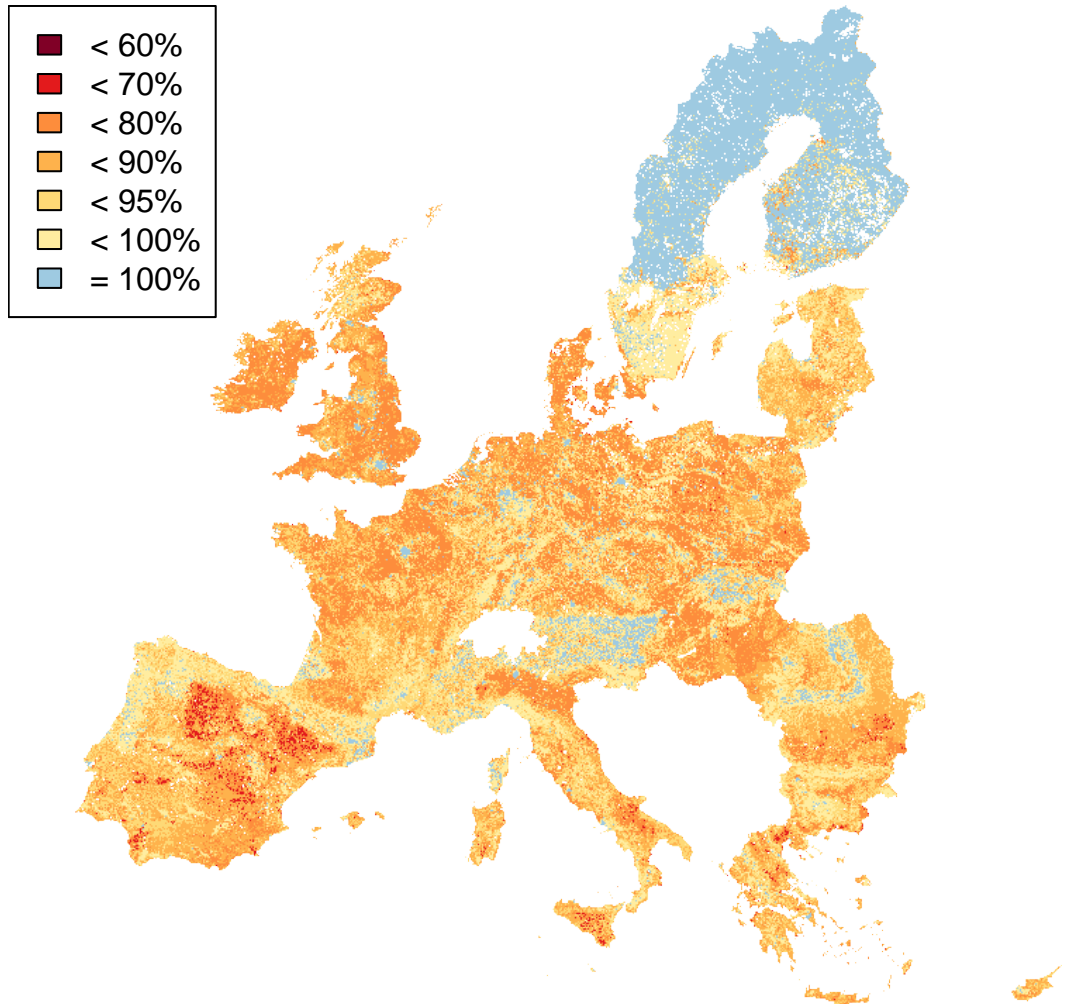

Figure S4.1: Percentage difference in species diversity in different land uses, relative to the natural/semi-natural baseline, for EU27 Countries at a 1km<sup>2</sup> resolution.

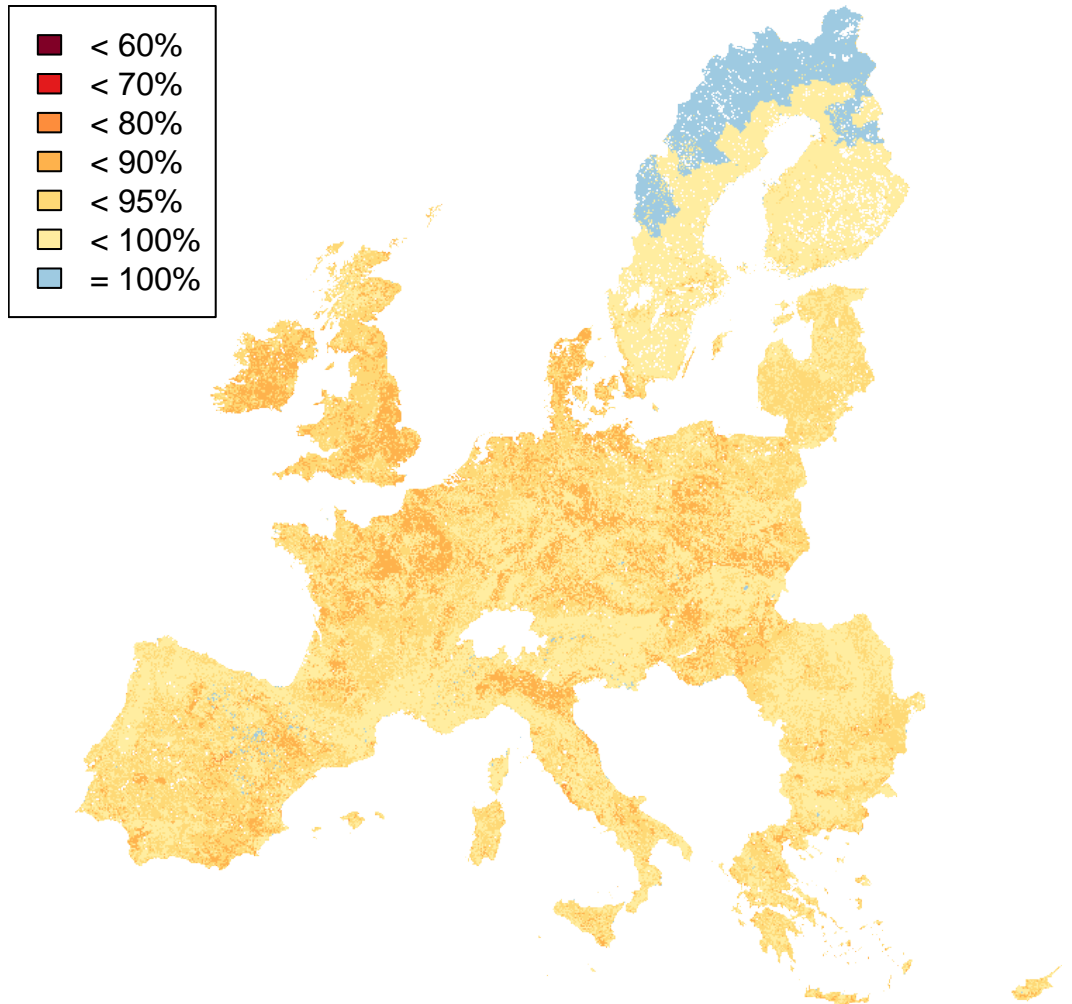

Figure S4.2: Percentage difference in functional diversity in different land uses, relative to the natural/semi-natural baseline, for EU27 Countries at a 1km<sup>2</sup> resolution.

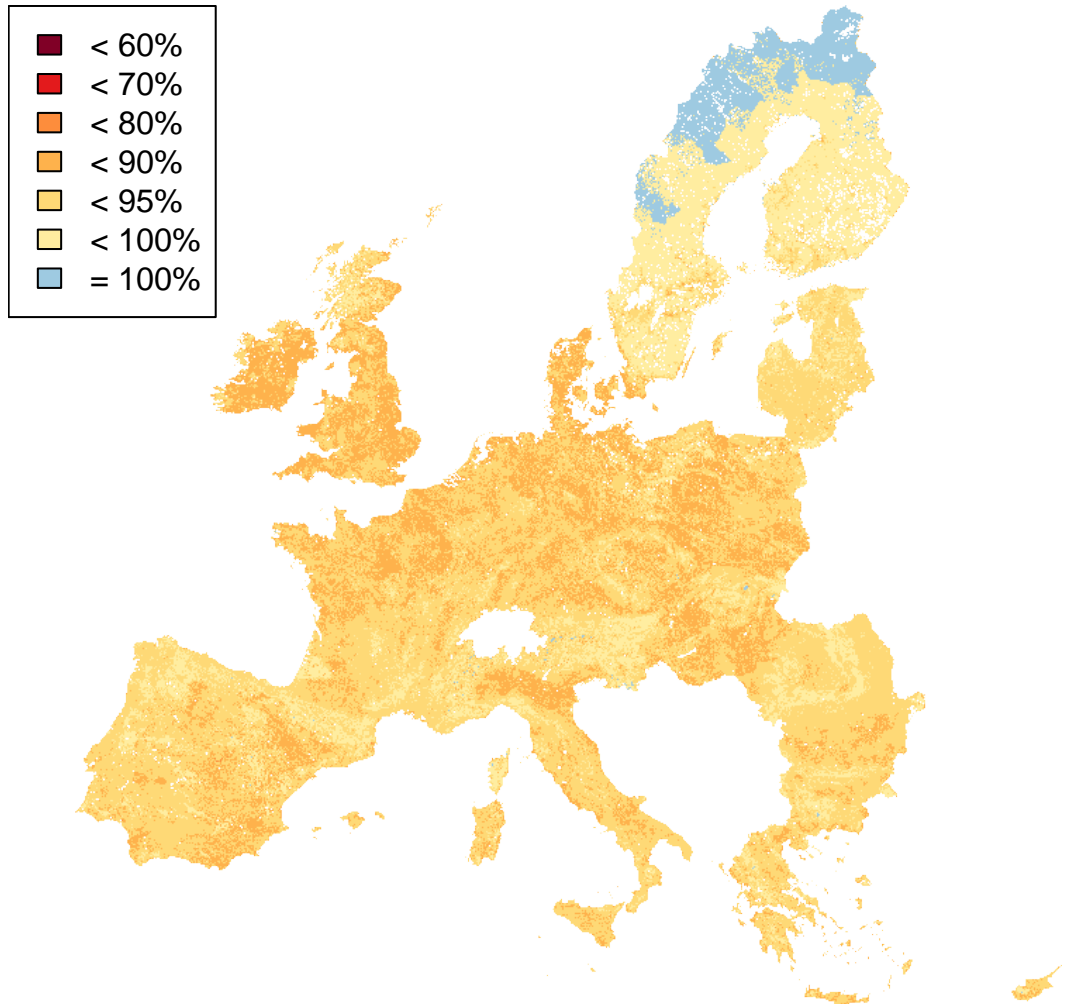

Figure S4.3: Percentage difference in phylogenetic diversity in different land uses, relative to the natural/semi-natural baseline, for EU27 Countries at a 1km<sup>2</sup> resolution.

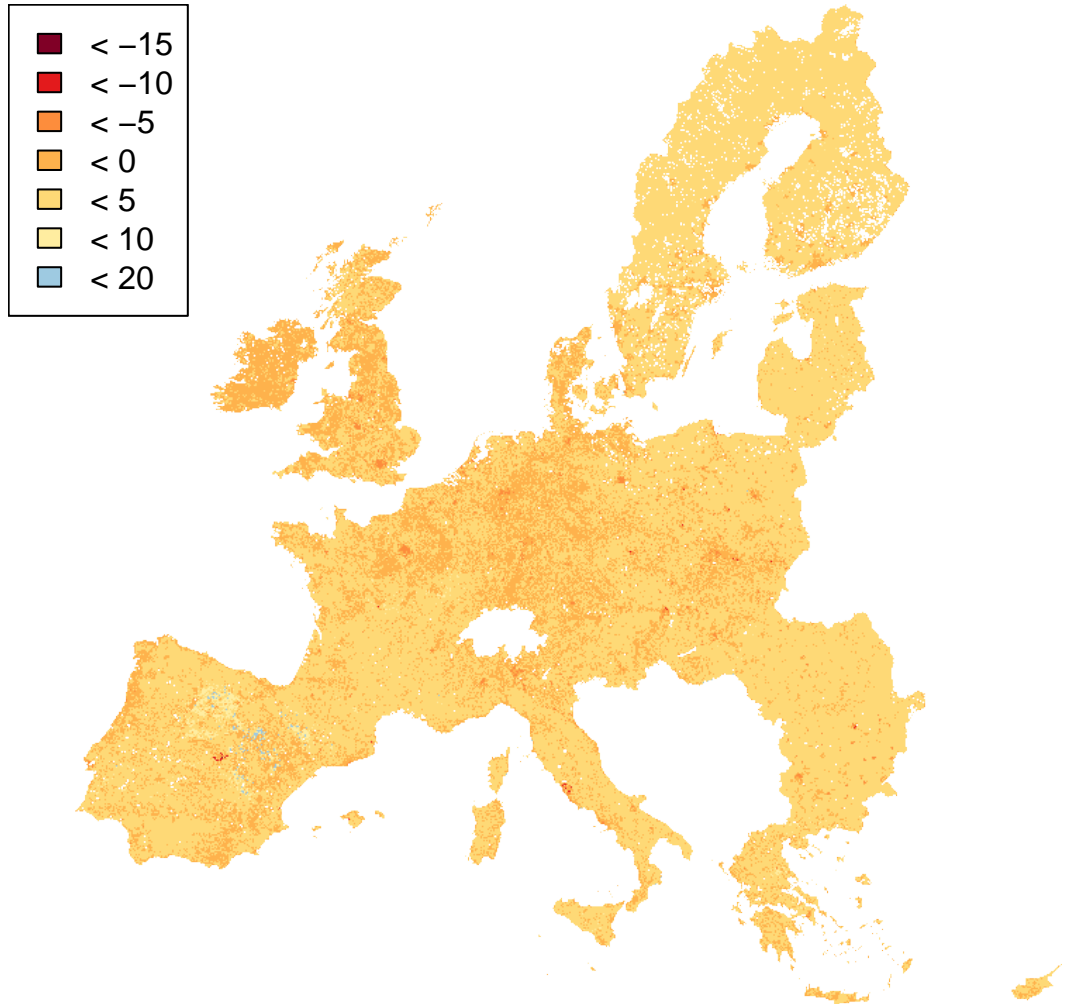

Figure S4.4: Residuals of a linear model of species diversity against functional diversity (i.e., a model of Fig. S4.1 against Fig. S4.2).

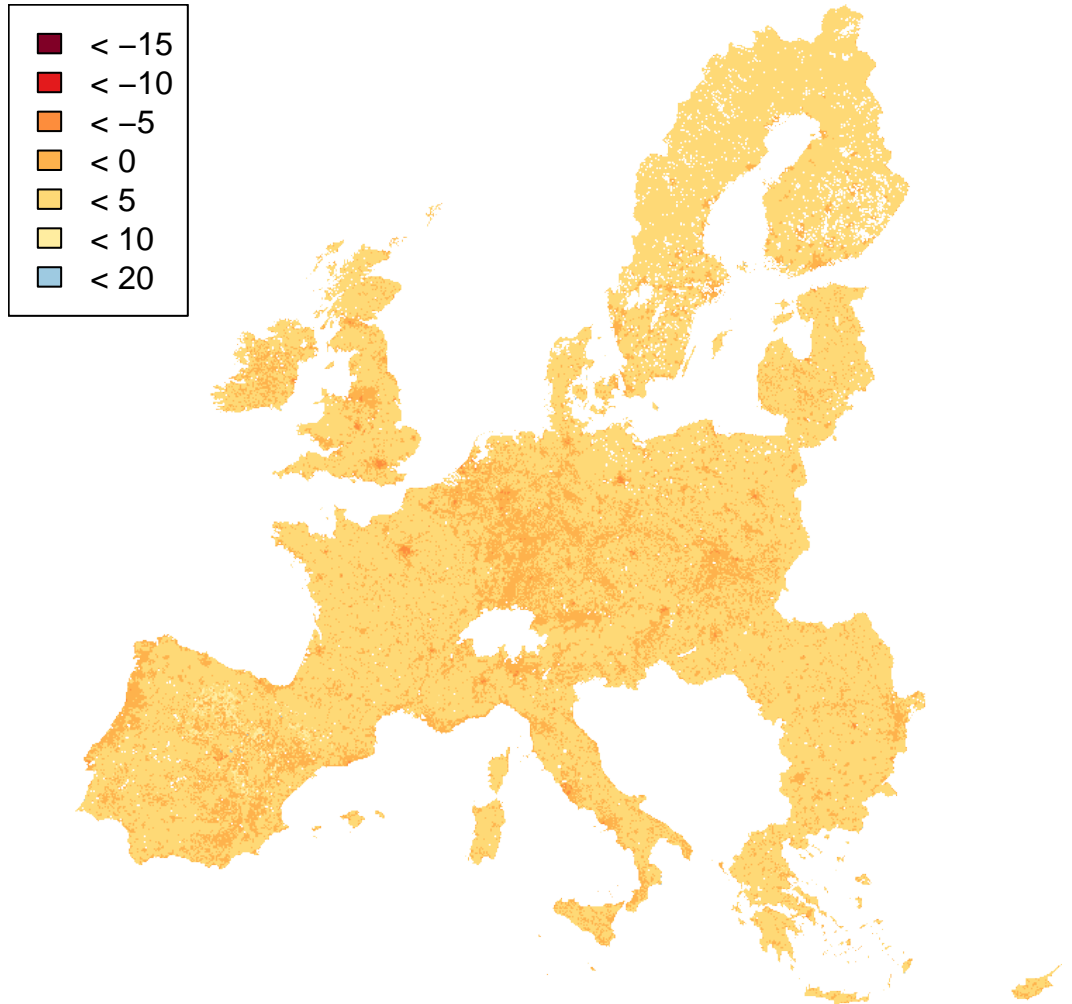

Figure S4.5: Residuals of a linear model of species diversity against phylogenetic diversity (i.e., a model of Fig. S4.1 against Fig. S4.3).

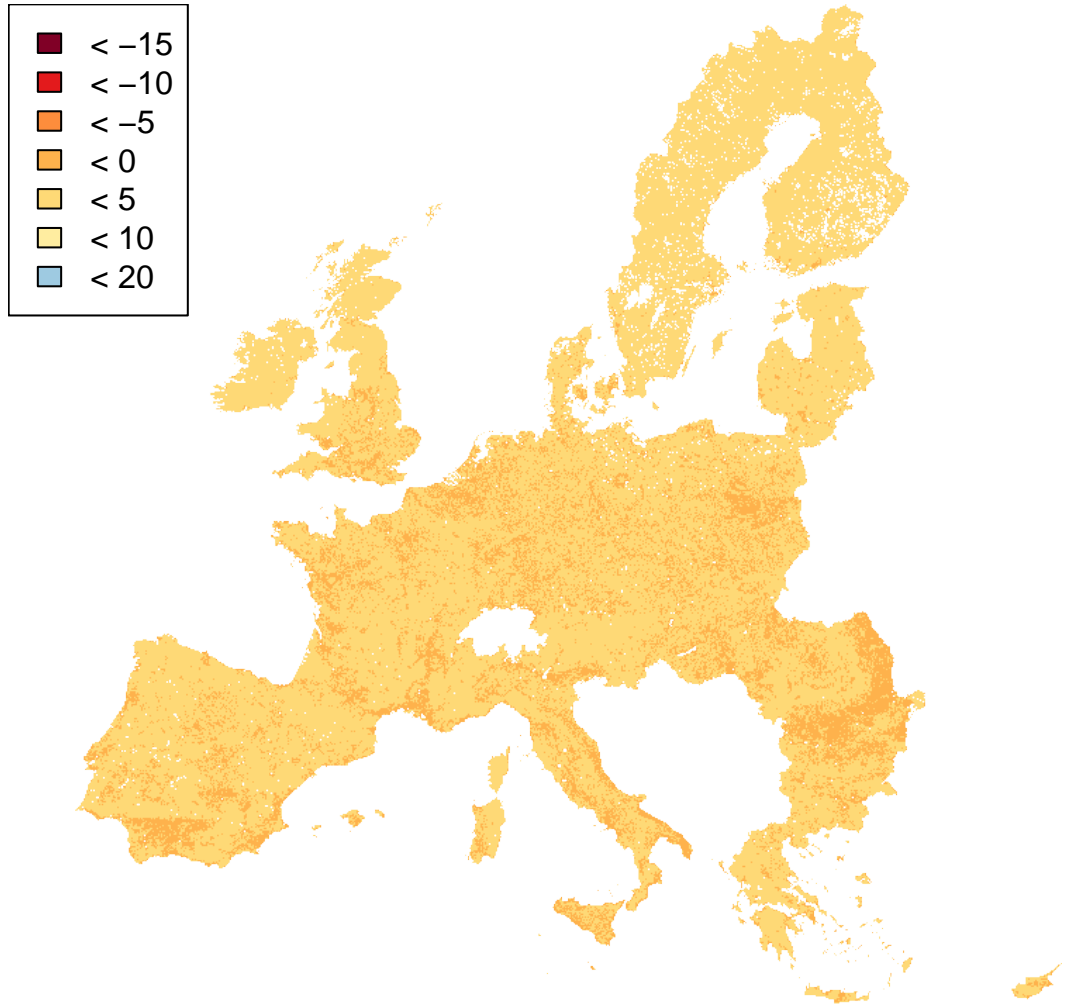

Figure S4.6: Residuals of a linear model of Fig. S4.4 against Fig. S4.5, that is, the difference between functional and phylogenetic diversity once correlations with species diversity are accounted for.

## References

- Albrecht, M., Schmid, B., Obrist, M.K., Schüpbach, B., Kleijn, D. & Duelli, P. (2010) Effects of ecological compensation meadows on arthropod diversity in adjacent intensively managed grassland, *Biological Conservation*, **143**:642–649.
- Almeida, E. & Danforth, B.N. (2009) Phylogeny of colletid bees (Hymenoptera: Colletidae) inferred from four nuclear genes, *Molecular Phylogenetics and Evolution*, **50**:290–309.
- Bates, A.J., Sadler, J.P., Fairbrass, A.J., Falk, S.J., Hale, J.D. & Matthews, T.J. (2011) Changing bee and hoverfly pollinator assemblages along an urban-rural gradient, *PLoS ONE*, **6**:e23459.
- Billeter, R., Liira, J., Bailey, D., Bugter, R., Arens, P., Augenstein, I., Aviron, S., Baudry, J., Bukacek, R., Burel, F., Cerny, M., De Blust, G., De Cock, R., Diekötter, T., Dietz, H., Dirksen, J., Dormann, C., Durka, W., Frenzel, M., Hamersky, R., Hendrickx, F., Herzog, F., Klotz, S., Koolstra, B., Lausch, A., Le Coeur, D., Maelfait, J.P., Opdam, P., Roubalova, M., Schermann, A., Schermann, N., Schmidt, T., Schweiger, O., Smulders, M., Speelmans, M., Simova, P., Verboom, J., Van Wingerden, W., Zobel, M. & Edwards, P. (2007) Indicators for biodiversity in agricultural landscapes: a pan-European study, *Journal of Applied Ecology*, **45**:141–150.
- Bivand, R. & Piras, G. (2015) Comparing Implementations of Estimation Methods for Spatial Econometrics, *Journal of Statistical Software*, **63**:1–36.
- Bivand, R.S., Hauke, J. & Kossowski, T. (2013) Computing the Jacobian in Gaussian spatial autoregressive models: An illustrated comparison of available methods, *Geographical Analysis*, **45**:150–179.
- Britton, T., Anderson, C.L., Jacquet, D., Lundqvist, S. & Bremer, K. (2007) Estimating divergence times in large phylogenetic trees, *Systematic biology*, **56**:741–752.
- Danforth, B.N., Eardley, C., Packer, L., Walker, K., Pauly, A. & Randrianambinintsoa, F.J. (2008) Phylogeny of Halictidae with an emphasis on endemic African Halictinae, *Apidologie*, **39**:86–U42.

- De Palma, A., Abrahamczyk, S., Aizen, M.A., Albrecht, M., Basset, Y., Bates, A., Blake, R.J., Boutin, C., Bugter, R., Connop, S., Cruz-López, L., Cunningham, S.A., Darvill, B., Diekötter, T., Dorn, S., Downing, N., Entling, M.H., Farwig, N., Felicioli, A., Fonte, S.J., Fowler, R., Franzén, M., Goulson, D., Grass, I., Hanley, M.E., Hendrix, S.D., Herrmann, F., Herzog, F., Holzschuh, A., Jauker, B., Kessler, M., Knight, M.E., Kruess, A., Lavelle, P., Le Féon, V., Lentini, P., Malone, L.A., Marshall, J., Pachón, E.M., McFrederick, Q.S., Morales, C.L., Mudri-Stojnic, S., Nates-Parra, G., Nilsson, S.G., Öckinger, E., Osgathorpe, L., Parra-H, A., Peres, C.A., Persson, A.S., Petanidou, T., Poveda, K., Power, E.F., Quaranta, M., Quintero, C., Rader, R., Richards, M.H., Roulston, T., Rousseau, L., Sadler, J.P., Samnegård, U., Schellhorn, N.A., Schüepp, C., Schweiger, O., Smith-Pardo, A.H., Steffan-Dewenter, I., Stout, J.C., Tonietto, R.K., Tschardtke, T., Tylianakis, J.M., Verboven, H.A.F., Vergara, C.H., Verhulst, J., Westphal, C., Yoon, H.J. & Purvis, A. (2016) Predicting bee community responses to land-use changes: Effects of geographic and taxonomic biases, *Scientific Reports*, **6**:31153.
- Diekötter, T., Billeter, R. & Crist, T.O. (2008) Effects of landscape connectivity on the spatial distribution of insect diversity in agricultural mosaic landscapes, *Basic and Applied Ecology*, **9**:298–307.
- Fowler, R.E. (2014) *An investigation into bee assemblage change along an urban-rural gradient*, Ph.D. thesis.
- Franzén, M. & Nilsson, S.G. (2008) How can we preserve and restore species richness of pollinating insects on agricultural land?, *Ecography*, **31**:698–708.
- Hanley, M. (2011) Unpublished data of bee diversity in UK croplands and urban habitats.
- Hedtke, S.M., Patiny, S. & Danforth, B.N. (2013) The bee tree of life: a supermatrix approach to apoid phylogeny and biogeography, *BMC Evolutionary Biology*, **13**:138.
- Holzschuh, A., Dormann, C.F., Tschardtke, T., Steffan-Dewenter, I. & B, P.R.S. (2011) Expansion of mass-flowering crops leads to transient pollinator dilution and reduced wild plant pollination, *Proceedings of the Royal Society B: Biological Sciences*, **278**:3444–3451.



Hoskins, A.J., Bush, A., Gilmore, J., Harwood, T., Hudson, L.N., Ware, C., Williams, K.J. & Ferrier, S. (2016) Downscaling land-use data to provide global 30' estimates of five land-use classes, *Ecology and Evolution*:n/a–n/a.

Hudson, L.N., Newbold, T., Contu, S., Hill, S.L.L., Lysenko, I., De Palma, A., Phillips, H.R.P., Senior, R.A., Bennett, D.J., Booth, H., Choimes, A., Correia, D.L.P., Day, J., Echeverría-Londoño, S., Garon, M., Harrison, M.L.K., Ingram, D.J., Jung, M., Kemp, V., Kirkpatrick, L., Martin, C.D., Pan, Y., White, H.J., Aben, J., Abrahamczyk, S., Adum, G.B., Aguilar-Barquero, V., Aizen, M.A., Ancrenaz, M., Arbeláez-Cortés, E., Armbrrecht, I., Azhar, B., Azpiroz, A.B., Baeten, L., Báldi, A., Banks, J.E., Barlow, J., Batáry, P., Bates, A.J., Bayne, E.M., Beja, P., Berg, Á., Berry, N.J., Bicknell, J.E., Bihn, J.H., Böhning-Gaese, K., Boekhout, T., Boutin, C., Bouyer, J., Brearley, F.Q., Brito, I., Brunet, J., Buczkowski, G., Buscardo, E., Cabra-García, J., Calviño-Cancela, M., Cameron, S.A., Canello, E.M., Carrijo, T.F., Carvalho, A.L., Castro, H., Castro-Luna, A.A., Cerda, R., Cerezo, A., Chauvat, M., Clarke, F.M., Cleary, D.F.R., Connop, S.P., D'Aniello, B., da Silva, P.G., Darvill, B., Dauber, J., Dejean, A., Diekötter, T., Dominguez-Haydar, Y., Dormann, C.F., Dumont, B., Dures, S.G., Dynesius, M., Edenius, L., Elek, Z., Entling, M.H., Farwig, N., Fayle, T.M., Felicicoli, A., Felton, A.M., Ficetola, G.F., Filgueiras, B.K.C., Fonte, S.J., Fraser, L.H., Fukuda, D., Furlani, D., Ganzhorn, J.U., Garden, J.G., Gheler-Costa, C., Giordani, P., Giordano, S., Gottschalk, M.S., Goulson, D., Gove, A.D., Grogan, J., Hanley, M.E., Hanson, T., Hashim, N.R., Hawes, J.E., Hébert, C., Helden, A.J., Henden, J.A., Hernández, L., Herzog, F., Higuera-Diaz, D., Hilje, B., Horgan, F.G., Horváth, R., Hylander, K., Isaacs-Cubides, P., Ishitani, M., Jacobs, C.T., Jaramillo, V.J., Jauker, B., Jonsell, M., Jung, T.S., Kapoor, V., Kati, V., Katovai, E., Kessler, M., Knop, E., Kolb, A., Korösi, Á., Lachat, T., Lantschner, V., Le Féon, V., LeBuhn, G., Légaré, J.P., Letcher, S.G., Littlewood, N.A., López-Quintero, C.A., Louhaichi, M., Lövei, G.L., Lucas-Borja, M.E., Luja, V.H., Maeto, K., Magura, T., Mallari, N.A., Marin-Spiotta, E., Marshall, E.J.P., Martínez, E., Mayfield, M.M., Mikusinski, G., Milder, J.C., Miller, J.R., Morales, C.L., Muchane, M.N., Muchane, M., Naidoo, R., Nakamura, A., Naoe, S., Nates-Parra, G., Navarrete Gutierrez, D.A., Neuschulz, E.L., Noreika, N., Norfolk, O., Noriega, J.A., Nöske, N.M., O'Dea, N., Oduro, W., Ofori-Boateng, C., Oke, C.O., Osgathorpe, L.M.,

- Paritsis, J., Parra-H, A., Pelegrin, N., Peres, C.A., Persson, A.S., Petanidou, T., Phalan, B., Philips, T.K., Poveda, K., Power, E.F., Presley, S.J., Proença, V., Quaranta, M., Quintero, C., Redpath-Downing, N.A., Reid, J.L., Reis, Y.T., Ribeiro, D.B., Richardson, B.A., Richardson, M.J., Robles, C.A., Römbke, J., Romero-Duque, L.P., Rosselli, L., Rossiter, S.J., Roulston, T.H., Rousseau, L., Sadler, J.P., Sáfíán, S., Saldaña-Vázquez, R.A., Samnegård, U., Schüepp, C., Schweiger, O., Sedlock, J.L., Shahabuddin, G., Sheil, D., Silva, F.A.B., Slade, E.M., Smith-Pardo, A.H., Sodhi, N.S., Somarriba, E.J., Sosa, R.A., Stout, J.C., Struebig, M.J., Sung, Y.H., Threlfall, C.G., Tonietto, R., Tóthmérész, B., Tschardtke, T., Turner, E.C., Tylianakis, J.M., Vanbergen, A.J., Vassilev, K., Verboven, H.A.F., Vergara, C.H., Vergara, P.M., Verhulst, J., Walker, T.R., Wang, Y., Watling, J.I., Wells, K., Williams, C.D., Willig, M.R., Woinarski, J.C.Z., Wolf, J.H.D., Woodcock, B.A., Yu, D.W., Zaitsev, A.S., Collen, B., Ewers, R.M., Mace, G.M., Purves, D.W., Scharlemann, J.P.W. & Purvis, A. (2014) The PREDICTS database: a global database of how local terrestrial biodiversity responds to human impacts, *Ecology and Evolution*, **4**:4701–4735.
- Hudson, L.N., Newbold, T., Contu, S., Hill, S.L.L., Lysenko, I., De Palma, A., Phillips, H.R.P., Alhusseini, T.I., Bedford, F.E., Bennett, D.J., Booth, H., Burton, V.J.,... & Purvis, A. (2014) The database of the PREDICTS (Projecting Responses of Ecological Diversity in Changing Terrestrial Systems) project, *Ecology and Evolution*, **7**:145–188.
- Jauker, B., Krauss, J., Jauker, F. & Steffan-Dewenter, I. (2013) Linking life history traits to pollinator loss in fragmented calcareous grasslands, *Landscape Ecology*, **28**:107–120.
- Kohler, F., Verhulst, J., Van Klink, R. & Kleijn, D. (2007) At what spatial scale do high-quality habitats enhance the diversity of forbs and pollinators in intensively farmed landscapes?, *Journal of Applied Ecology*, **45**:753–762.
- Kruess, A. & Tschardtke, T. (2002) Grazing Intensity and the Diversity of Grasshoppers, Butterflies, and Trap-Nesting Bees and Wasps, *Conservation Biology*, **16**:1570–1580.
- Le Féon, V., Schermann-Legionnet, A., Delettre, Y., Aviron, S., Billeter, R., Bugter, R., Hendrickx, F. & Burel, F. (2010) Intensification of agriculture, landscape composition and wild

- bee communities: A large scale study in four European countries, *Agriculture Ecosystems & Environment*, **137**:143–150.
- Marshall, E., West, T. & Kleijn, D. (2006) Impacts of an agri-environment field margin prescription on the flora and fauna of arable farmland in different landscapes, *Agriculture, Ecosystems & Environment*, **113**:36–44.
- Meyer, B., Gaebele, V. & Steffan-Dewenter, I.D. (2007) Patch Size and Landscape Effects on Pollinators and Seed Set of the Horseshoe Vetch, *Hippocrepis comosa*, in an Agricultural Landscape of Central Europe, *Entomologia Generalis*, **30**:173–185.
- Meyer, B., Jauker, F. & Steffan-Dewenter, I. (2009) Contrasting resource-dependent responses of hoverfly richness and density to landscape structure, *Basic and Applied Ecology*, **10**:178–186.
- Michener, C.D. (2000) *The Bees of the World*, The John Hopkins University Press, London, 913 pp.
- Mudri-Stojnic, S., Andric, A., Józán, Z. & Vujic, A. (2012) Pollinator diversity (Hymenoptera and Diptera) in semi-natural habitats in Serbia during summer, *Archives of Biological Sciences*, **64**:777–786.
- Power, E.F. & Stout, J.C. (2011) Organic dairy farming: impacts on insect-flower interaction networks and pollination, *Journal of Applied Ecology*, **48**:561–569.
- Quaranta, M., Ambroselli, S., Barro, P., Bella, S., Carini, A., Celli, G., Cogoi, P., Comba, L., Comoli, R., Felicioli, A., Floris, I., Intoppa, F., Longo, S., Maini, S., Manino, A., Mazzeo, G., Medrzycki, P., Nardi, E., Niccolini, L., Palmieri, N., Patetta, A., Piatti, C., Piazza, M., Pinzauti, M., Porporato, M., Porrini, C., Ricciardelli d'Albore, G., Romagnoli, F., Ruiu, L., Satta, A. & Zandigiaco, P. (2004) Wild bees in agroecosystems and semi-natural landscapes. 1997-2000 collection period in Italy, *Bulletin of Insectology*, **57**:11–61.
- Ronquist, F., Teslenko, M., van der Mark, P., Ayres, D.L., Darling, A., Höhna, S., Larget, B., Liu, L., Suchard, M.A. & Huelsenbeck, J.P. (2012) MrBayes 3.2: Efficient Bayesian Phylogenetic Inference and Model Choice Across a Large Model Space, *Systematic Biology*, **61**:539–542.

- Samnegård, U., Persson, A.S. & Smith, H.G. (2011) Gardens benefit bees and enhance pollination in intensively managed farmland, *Biological Conservation*, **144**:2602–2606.
- Schüepp, C., Herrmann, J.D., Herzog, F. & Schmidt-Entling, M.H. (2011) Differential effects of habitat isolation and landscape composition on wasps, bees, and their enemies, *Oecologia*, **165**:713–721.
- Thomas, G.H., Hartmann, K., Jetz, W., Joy, J.B., Mimoto, A. & Mooers, A.O. (2013) PASTIS: an R package to facilitate phylogenetic assembly with soft taxonomic inferences, *Methods in Ecology and Evolution*, **4**:1011–1017.
- Weiner, C.N., Werner, M., Linsenmair, K.E. & Blüthgen, N. (2011) Land use intensity in grasslands: Changes in biodiversity, species composition and specialisation in flower visitor networks, *Basic and Applied Ecology*, **12**:292–299.
